# Supplementary material
Source: PubMed Central journal article supplement (PMC8487804)
Supplement: 726_2021_3081_MOESM1_ESM.pdf [file 726_2021_3081_MOESM1_ESM.pdf]

## Acquisition Method Info

Method Name Daytam AA method.m  
 Method Path D:\MassHunter\Methods\Daytam AA method.m  
 Method Description 6460 Triple Quad LC/MS ESI with Agilent Jet Stream Technology  
 Positive MRM Reserpine Checkout

## Device List

HiP Sampler  
 Quat. Pump  
 Column Comp.  
 QQQ

## MS QQQ Mass Spectrometer

Ion Source AJS ESI Tune File D:\MassHunter\Tune\QQQ\G6460C\atunes.TUNE.XML  
 Stop Mode No Limit/As Pump Stop Time (min) 2.0  
 Time Filter On Time Filter Width (min) 0.1

## Time Segments

| Index | Start Time (min) | Scan Type | Ion Mode               | Div Valve | Delta EMV | Store |
|-------|------------------|-----------|------------------------|-----------|-----------|-------|
| 1     | 0                | MRM       | ESI+Agilent Jet Stream | To Waste  | 0         | No    |
| 2     | 1.5              | MRM       | ESI+Agilent Jet Stream | To MS     | 0         | Yes   |
| 3     | 5.5              | MRM       | ESI+Agilent Jet Stream | To Waste  | 0         | No    |

## Time Segment 1

## Scan Segments

| Cpd Name   | ISTD? | Prec Ion | MS1 Res         | Prod Ion | MS2 Res         | Dwell | Frag (V) | CE (V) | Cell Acc (V) | Polarity |
|------------|-------|----------|-----------------|----------|-----------------|-------|----------|--------|--------------|----------|
| Compound 1 | No    | 350      | Unit/Enh (6490) | 200      | Unit/Enh (6490) | 200   | 135      | 0      | 7            | Positive |

## Scan Parameters

Data Stg Centroid Threshold 0

## Source Parameters

| Parameter        | Value (+) | Value (-) |
|------------------|-----------|-----------|
| Gas Temp (°C)    | 150       | 150       |
| Gas Flow (l/min) | 11        | 11        |
| Nebulizer (psi)  | 40        | 40        |
| SheathGasHeater  | 400       | 400       |
| SheathGasFlow    | 11        | 11        |
| Capillary (V)    | 2000      | 0         |
| VCharging        | 0         | 0         |

## Time Segment 2

## Scan Segments

| Cpd Name        | ISTD? | Prec Ion | MS1 Res         | Prod Ion | MS2 Res         | Dwell | Frag (V) | CE (V) | Cell Acc (V) | Polarity |
|-----------------|-------|----------|-----------------|----------|-----------------|-------|----------|--------|--------------|----------|
| DL-Cystine IS   | Yes   | 244.9    | Unit/Enh (6490) | 153.9    | Unit/Enh (6490) | 5     | 90       | 8      | 7            | Positive |
| L-Cystine       | No    | 241      | Unit/Enh (6490) | 74.2     | Unit/Enh (6490) | 5     | 100      | 24     | 7            | Positive |
| L-Tryptophan IS | Yes   | 210.1    | Unit/Enh (6490) | 192.1    | Unit/Enh (6490) | 5     | 90       | 4      | 7            | Positive |
| L-Tryptophan    | No    | 205.1    | Unit/Enh (6490) | 188.1    | Unit/Enh (6490) | 5     | 80       | 1      | 7            | Positive |
| L-Tyrosine IS   | Yes   | 192.1    | Unit/Enh (6490) | 145.2    | Unit/Enh (6490) | 5     | 80       | 8      | 7            | Positive |
| L-Tyrosine      | No    | 182.1    | Unit/Enh (6490) | 165      | Unit/Enh (6490) | 5     | 100      | 1      | 7            | Positive |
| L-Citrulline IS | Yes   | 177.2    | Unit/Enh (6490) | 160.2    | Unit/Enh (6490) | 5     | 90       | 4      | 7            | Positive |
| L-Arginine IS   | Yes   | 177.2    | Unit/Enh (6490) | 70.2     | Unit/Enh (6490) | 5     | 110      | 20     | 7            | Positive |
| L-Citrulline    | No    | 176.4    | Unit/Enh (6490) | 159.3    | Unit/Enh (6490) | 5     | 80       | 3      | 7            | Positive |

# Acquisition Method Report

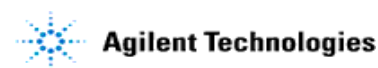

| Cpd Name                            | ISTD? | Prec Ion | MS1 Res         | Prod Ion | MS2 Res         | Dwell | Frag (V) | CE (V) | Cell Acc (V) | Polarity |
|-------------------------------------|-------|----------|-----------------|----------|-----------------|-------|----------|--------|--------------|----------|
| L-Arginine                          | No    | 175.2    | Unit/Enh (6490) | 70.2     | Unit/Enh (6490) | 5     | 110      | 20     | 7            | Positive |
| L-Phenylalanine IS                  | Yes   | 175.1    | Unit/Enh (6490) | 129.1    | Unit/Enh (6490) | 5     | 100      | 8      | 7            | Positive |
| 3-Methyl-L-Histidine IS             | Yes   | 173.2    | Unit/Enh (6490) | 127.2    | Unit/Enh (6490) | 5     | 80       | 10     | 7            | Positive |
| 3-Methyl-L-Histidine L-             | No    | 170.1    | Unit/Enh (6490) | 124.1    | Unit/Enh (6490) | 5     | 100      | 10     | 7            | Positive |
| L-Phenylalanine DL-5-Hydroxy lysine | No    | 166.1    | Unit/Enh (6490) | 120.1    | Unit/Enh (6490) | 5     | 80       | 6      | 7            | Positive |
| L-Histidine                         | No    | 163.1    | Unit/Enh (6490) | 128.1    | Unit/Enh (6490) | 5     | 90       | 6      | 7            | Positive |
| L-Methionine IS                     | Yes   | 153.1    | Unit/Enh (6490) | 107.2    | Unit/Enh (6490) | 5     | 80       | 6      | 7            | Positive |
| L-Lysine IS                         | Yes   | 151.1    | Unit/Enh (6490) | 88.1     | Unit/Enh (6490) | 5     | 90       | 16     | 7            | Positive |
| L-Methionine L-Glutamic acid IS     | No    | 150.1    | Unit/Enh (6490) | 104.1    | Unit/Enh (6490) | 5     | 80       | 4      | 7            | Positive |
| L-Glutamine IS                      | Yes   | 150.1    | Unit/Enh (6490) | 85.2     | Unit/Enh (6490) | 5     | 80       | 12     | 7            | Positive |
| L-Glutamic acid                     | Yes   | 148.1    | Unit/Enh (6490) | 85.1     | Unit/Enh (6490) | 5     | 80       | 14     | 7            | Positive |
| L-Lysine                            | No    | 148.1    | Unit/Enh (6490) | 84.2     | Unit/Enh (6490) | 5     | 80       | 12     | 7            | Positive |
| L-Glutamine L-Leucine IS            | No    | 147.1    | Unit/Enh (6490) | 84.2     | Unit/Enh (6490) | 5     | 80       | 12     | 7            | Positive |
| L-Ornithine IS                      | No    | 147.1    | Unit/Enh (6490) | 84.2     | Unit/Enh (6490) | 5     | 80       | 12     | 7            | Positive |
| L-Aspartic acid IS                  | Yes   | 142.2    | Unit/Enh (6490) | 96.3     | Unit/Enh (6490) | 5     | 90       | 6      | 7            | Positive |
| L-Asparagine IS                     | Yes   | 138.2    | Unit/Enh (6490) | 74.2     | Unit/Enh (6490) | 5     | 80       | 16     | 7            | Positive |
| L-Aspartic acid L-ornithine         | Yes   | 137.1    | Unit/Enh (6490) | 91.2     | Unit/Enh (6490) | 5     | 90       | 5      | 7            | Positive |
| L-Asparagine                        | Yes   | 135      | Unit/Enh (6490) | 89.1     | Unit/Enh (6490) | 5     | 80       | 4      | 7            | Positive |
| L-Aspartic acid                     | No    | 134.1    | Unit/Enh (6490) | 74.1     | Unit/Enh (6490) | 5     | 90       | 10     | 7            | Positive |
| L-ornithine                         | No    | 133.2    | Unit/Enh (6490) | 70.3     | Unit/Enh (6490) | 5     | 80       | 14     | 7            | Positive |
| L-asparagine                        | No    | 133.1    | Unit/Enh (6490) | 74.2     | Unit/Enh (6490) | 5     | 70       | 10     | 7            | Positive |
| L-isoleucine                        | No    | 132.2    | Unit/Enh (6490) | 69.2     | Unit/Enh (6490) | 5     | 100      | 14     | 7            | Positive |
| Trans-4-hydroxy L-proline           | No    | 132.2    | Unit/Enh (6490) | 68.2     | Unit/Enh (6490) | 5     | 90       | 20     | 7            | Positive |
| L-Leucine                           | No    | 132.2    | Unit/Enh (6490) | 43.3     | Unit/Enh (6490) | 5     | 100      | 24     | 7            | Positive |
| DL-Valine IS                        | Yes   | 126.1    | Unit/Enh (6490) | 80.2     | Unit/Enh (6490) | 5     | 80       | 8      | 7            | Positive |
| Taurine                             | No    | 126.1    | Unit/Enh (6490) | 44.3     | Unit/Enh (6490) | 5     | 110      | 14     | 7            | Positive |
| L-Proline IS                        | Yes   | 122.1    | Unit/Enh (6490) | 75.2     | Unit/Enh (6490) | 5     | 90       | 14     | 7            | Positive |
| L-Threonine IS                      | Yes   | 121.1    | Unit/Enh (6490) | 75       | Unit/Enh (6490) | 5     | 80       | 6      | 7            | Positive |
| L-Threonine                         | No    | 120.2    | Unit/Enh (6490) | 74.2     | Unit/Enh (6490) | 5     | 80       | 4      | 7            | Positive |
| L-Valine                            | No    | 118.2    | Unit/Enh (6490) | 72.2     | Unit/Enh (6490) | 5     | 80       | 4      | 7            | Positive |
| L-Norvaline                         | No    | 118.1    | Unit/Enh (6490) | 72.1     | Unit/Enh (6490) | 5     | 90       | 5      | 7            | Positive |
| L-Proline                           | No    | 116.2    | Unit/Enh (6490) | 70.2     | Unit/Enh (6490) | 5     | 90       | 12     | 7            | Positive |
| L-Serine IS                         | Yes   | 109.1    | Unit/Enh (6490) | 63       | Unit/Enh (6490) | 5     | 90       | 8      | 7            | Positive |
| L-Serine                            | No    | 106.2    | Unit/Enh (6490) | 60.2     | Unit/Enh (6490) | 5     | 80       | 4      | 7            | Positive |
| L-2-aminobutyric acid               | No    | 104.2    | Unit/Enh (6490) | 58.3     | Unit/Enh (6490) | 5     | 80       | 4      | 7            | Positive |
| 3-Amino isobutyric acid             | No    | 104.1    | Unit/Enh (6490) | 86.2     | Unit/Enh (6490) | 5     | 100      | 2      | 7            | Positive |

# Acquisition Method Report

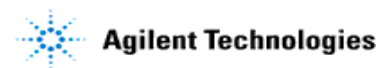

| Cpd Name                | ISTD? | Prec Ion | MS1 Res         | Prod Ion | MS2 Res         | Dwell | Frag (V) | CE (V) | Cell Acc (V) | Polarity |
|-------------------------|-------|----------|-----------------|----------|-----------------|-------|----------|--------|--------------|----------|
| Gamma-aminobutyric acid | No    | 104      | Unit/Enh (6490) | 87.1     | Unit/Enh (6490) | 5     | 80       | 6      | 7            | Positive |
| L-Alanine IS            | Yes   | 94.1     | Unit/Enh (6490) | 48.2     | Unit/Enh (6490) | 5     | 90       | 6      | 7            | Positive |
| L-Alanine               | No    | 90.2     | Unit/Enh (6490) | 44.2     | Unit/Enh (6490) | 5     | 80       | 4      | 7            | Positive |
| Beta-Alanine            | No    | 90.1     | Unit/Enh (6490) | 72.1     | Unit/Enh (6490) | 5     | 80       | 2      | 7            | Positive |
| Sarcosine               | No    | 90.1     | Unit/Enh (6490) | 44.2     | Unit/Enh (6490) | 5     | 90       | 8      | 7            | Positive |
| L-Glycine IS            | Yes   | 78.2     | Unit/Enh (6490) | 31.3     | Unit/Enh (6490) | 5     | 90       | 4      | 7            | Positive |
| L-Glycin                | No    | 76.2     | Unit/Enh (6490) | 30.1     | Unit/Enh (6490) | 5     | 80       | 1      | 7            | Positive |
| Ethanolamine            | No    | 62.1     | Unit/Enh (6490) | 44.2     | Unit/Enh (6490) | 5     | 80       | 4      | 7            | Positive |

## Scan Parameters

Data Stg      Threshold  
Centroid      0

## Source Parameters

| Parameter        | Value (+) | Value (-) |
|------------------|-----------|-----------|
| Gas Temp (°C)    | 150       | 150       |
| Gas Flow (l/min) | 11        | 11        |
| Nebulizer (psi)  | 40        | 40        |
| SheathGasHeater  | 400       | 400       |
| SheathGasFlow    | 11        | 11        |
| Capillary (V)    | 2000      | 0         |
| VCharging        | 0         | 0         |

## Time Segment 3

## Scan Segments

| Cpd Name   | ISTD? | Prec Ion | MS1 Res         | Prod Ion | MS2 Res         | Dwell | Frag (V) | CE (V) | Cell Acc (V) | Polarity |
|------------|-------|----------|-----------------|----------|-----------------|-------|----------|--------|--------------|----------|
| Compound 1 | No    | 350      | Unit/Enh (6490) | 200      | Unit/Enh (6490) | 200   | 135      | 0      | 7            | Positive |

## Scan Parameters

Data Stg      Threshold  
Centroid      0

## Source Parameters

| Parameter        | Value (+) | Value (-) |
|------------------|-----------|-----------|
| Gas Temp (°C)    | 150       | 150       |
| Gas Flow (l/min) | 11        | 11        |
| Nebulizer (psi)  | 40        | 40        |
| SheathGasHeater  | 400       | 400       |
| SheathGasFlow    | 11        | 11        |
| Capillary (V)    | 2000      | 0         |
| VCharging        | 0         | 0         |

## Chromatograms

Chrom Type      Label      Offset      Y-Range  
TIC      TIC      0      10000000

## Instrument Curves

Actual

Name: **HIP Sampler** Model: **G4226A**

### Auxiliary

|                          |              |
|--------------------------|--------------|
| Draw Speed               | 200.0 µL/min |
| Eject Speed              | 200.0 µL/min |
| Draw Position Offset     | 0.0 mm       |
| Wait Time After Drawing  | 2.0 s        |
| Sample Flush Out Factor  | 5.0          |
| Vial/Well bottom sensing | Yes          |

### Injection

|                      |                            |
|----------------------|----------------------------|
| Injection Mode       | Injection with needle wash |
| Injection Volume     | 3.00 µL                    |
| Needle Wash          |                            |
| Needle Wash Location | Flush Port                 |
| Wash Time            | 2.0 s                      |

### High throughput

|                                  |    |
|----------------------------------|----|
| Automatic Delay Volume Reduction | No |
| Overlapped Injection             |    |
| Enable Overlapped Injection      | No |

### Valve Switching

|                       |    |
|-----------------------|----|
| Valve Movements       | 0  |
| Valve Switch Time 1   |    |
| Switch Time 1 Enabled | No |
| Valve Switch Time 2   |    |
| Switch Time 2 Enabled | No |
| Valve Switch Time 3   |    |
| Switch Time 3 Enabled | No |
| Valve Switch Time 4   |    |
| Switch Time 4 Enabled | No |

### Stop Time

|               |                  |
|---------------|------------------|
| Stoptime Mode | As pump/No limit |
|---------------|------------------|

### Post Time

|               |     |
|---------------|-----|
| Posttime Mode | Off |
|---------------|-----|

Name: **Quat. Pump** Model: **G4204A**

Flow 0.700 mL/min  
 Use Solvent Types No  
 Low Pressure Limit 0.00 bar  
 High Pressure Limit 600.00 bar  
 Max. Flow Ramp Up 100.000 mL/min<sup>2</sup>  
 Primary Channel Automatic  
 Max. Flow Ramp Down 100.000 mL/min<sup>2</sup>

**Stroke**

Automatic Stroke Calculation Yes

**Compress**

Compressibility Mode No Compensation

**Mixer Selection**

Selected Mixer Use Mixer if installed

**Blend Assist**

Enabled No

**Stop Time**

Stoptime Mode Time set

Stoptime 10.00 min

**Post Time**

Posttime Mode Off

**Solvent Composition**

|   | Channel | Ch. 1 Solv.               | Name 1 | Used | Percent |
|---|---------|---------------------------|--------|------|---------|
| 1 | A       | 100.0 % Water V.03        |        | Yes  | 22.00 % |
| 2 | B       | 100.0 % Acetonitrile V.03 |        | Yes  | 78.00 % |
| 3 | C       |                           |        | No   |         |
| 4 | D       |                           |        | No   |         |

**Timetable**

|   | Time     | A       | B       | C      | D      | Flow         | Pressure |
|---|----------|---------|---------|--------|--------|--------------|----------|
| 1 | 1.00 min | 22.00 % | 78.00 % | 0.00 % | 0.00 % | 0.700 mL/min | --- bar  |
| 2 | 4.00 min | 70.00 % | 30.00 % | 0.00 % | 0.00 % | 0.700 mL/min | --- bar  |
| 3 | 5.00 min | 70.00 % | 30.00 % | 0.00 % | 0.00 % | 0.700 mL/min | --- bar  |
| 4 | 5.10 min | 22.00 % | 78.00 % | 0.00 % | 0.00 % | 0.700 mL/min | --- bar  |
| 5 | 9.00 min | 22.00 % | 78.00 % | 0.00 % | 0.00 % | 0.700 mL/min | --- bar  |

Name: **Column Comp.** Model: **G1316A**

**Left Temperature Control**

Temperature Control Mode Temperature Set

Temperature 30.0 °C

**Enable Analysis Left Temperature**

Enable Analysis Left Temperature On Yes

Enable Analysis Left Temperature Value 0.8 °C

**Right Temperature Control**

Right temperature Control Mode Combined

**Enable Analysis Right Temperature**

Enable Analysis Right Temperature On Yes

Enable Analysis Right Temperature Value 0.8 °C

**Stop Time**

Stoptime Mode As pump/injector

**Post Time**

Posttime Mode Off
